# Supplementary material
Source: PubMed Central journal article supplement (PMC6177684)
Supplement: NIHMS939969-supplement-1.pdf [file NIHMS939969-supplement-1.pdf]

## Supplemental Figure 1

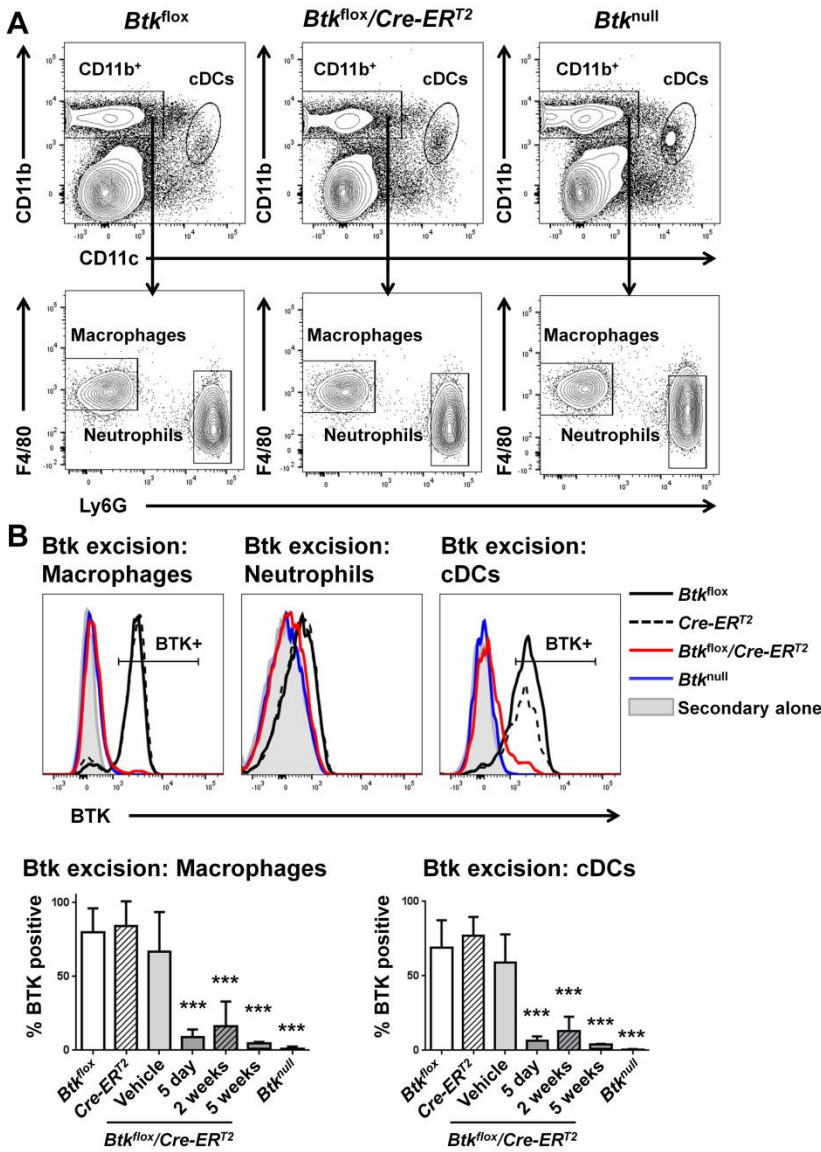

**Supplemental Figure 1. Inducible knockdown of Btk in  $Btk^{flox}/Cre-ER^{T2}$  is stably achieved in splenic innate cells.** (A) Representative flow plots for  $Btk^{flox}$  (left),  $Btk^{flox}/Cre-ER^{T2}$  (middle) and  $Btk^{null}$  (right) showing splenic macrophages ( $CD11b^+CD11c^-F4/80^+$ ), neutrophils ( $CD11b^+CD11c^-Ly6G^+$ ), and conventional dendritic cells (cDCs) ( $CD11b^+CD11c^+$ ), five days after tamoxifen injections. Cells are pre-gated as single live cells. (B, top) Representative histograms of macrophage (left), neutrophil (middle) and cDC (right) Btk expression five days after treatment. Shown are a representative  $Btk^{flox}$  (black, solid),  $Cre-ER^{T2}$  (black, dashed),  $Btk^{flox}/Cre-ER^{T2}$  (red),  $Btk^{null}$  (blue), and isotype control (gray). (B, bottom) Percent Btk positive macrophages (left) and cDCs (right). Shown in white are  $Btk^{flox}$  (solid, n=18), and  $Cre-ER^{T2}$  (diagonal pattern, n=8), in light gray  $Btk^{flox}/Cre-ER^{T2}$  vehicle controls (horizontal pattern, n=3), in gray  $Btk^{flox}/Cre-ER^{T2}$  after five days (solid, n=12), two weeks (diagonal pattern, n=5), or five weeks (horizontal pattern, n=3) and in black,  $Btk^{null}$  (n=13). \*\*\*p<0.001 as calculated by one-way ANOVA compared to  $Btk^{flox}$ .

|      |                                                                    | <i>Btk</i> <sup>flox</sup> | <i>Btk</i> <sup>flox</sup> / <i>Cre-ER</i> <sup>T2</sup><br>5 day | <i>Btk</i> <sup>flox</sup> / <i>Cre-ER</i> <sup>T2</sup><br>5 week | <i>Btk</i> <sup>null</sup> |
|------|--------------------------------------------------------------------|----------------------------|-------------------------------------------------------------------|--------------------------------------------------------------------|----------------------------|
| 1:10 | <i>Btk</i> <sup>flox</sup>                                         | X                          | NS                                                                | NS                                                                 | <0.001                     |
|      | <i>Btk</i> <sup>flox</sup> / <i>Cre-ER</i> <sup>T2</sup><br>5 day  | X                          | X                                                                 | NS                                                                 | <0.001                     |
|      | <i>Btk</i> <sup>flox</sup> / <i>Cre-ER</i> <sup>T2</sup><br>5 week | X                          | X                                                                 | X                                                                  | 0.0012                     |
| 1:20 | <i>Btk</i> <sup>flox</sup>                                         | X                          | NS                                                                | NS                                                                 | <0.001                     |
|      | <i>Btk</i> <sup>flox</sup> / <i>Cre-ER</i> <sup>T2</sup><br>5 day  | X                          | X                                                                 | NS                                                                 | 0.0031                     |
|      | <i>Btk</i> <sup>flox</sup> / <i>Cre-ER</i> <sup>T2</sup><br>5 week | X                          | X                                                                 | X                                                                  | 0.0073                     |
| 1:50 | <i>Btk</i> <sup>flox</sup>                                         | X                          | NS                                                                | NS                                                                 | 0.0215                     |
|      | <i>Btk</i> <sup>flox</sup> / <i>Cre-ER</i> <sup>T2</sup><br>5 day  | X                          | X                                                                 | NS                                                                 | NS                         |
|      | <i>Btk</i> <sup>flox</sup> / <i>Cre-ER</i> <sup>T2</sup><br>5 week | X                          | X                                                                 | X                                                                  | NS                         |

**Supplemental Table 1: Statistics for Figure 6.**
